# Supplementary material for: TET1s deficiency exacerbates oscillatory shear flow-induced atherosclerosis
Source: Int J Biol Sci. 2022 Feb 28;18(5):2163–80. doi: 10.7150/ijbs.69281 (PMC8935216; doi:10.7150/ijbs.69281)
Supplement: Supplementary file 1 — Supplementary figures and tables. [file ijbsv18p2163s1.pdf]

## Supplementary files

# TET1s deficiency exacerbates oscillatory shear flow-induced atherosclerosis

Kai Qu<sup>1</sup>, Caihong Wang<sup>1</sup>, Lu Huang<sup>1</sup>, Xian Qin<sup>1</sup>, Kun Zhang<sup>1</sup>, Yuan Zhong<sup>1</sup>, Qingfeng Ma<sup>1</sup>, Wenhua Yan<sup>1</sup>,  
Tianhan Li<sup>1</sup>, Qin Peng<sup>2</sup>, Yi Wang<sup>1</sup>, Hans Gregersen<sup>1,3</sup>, Chaojun Tang<sup>4</sup>, Juhui Qiu<sup>1,\*</sup>, Guixue Wang<sup>1,\*</sup>

1. Key Laboratory for Biorheological Science and Technology of Ministry of Education, State and Local Joint Engineering Laboratory for Vascular Implants, College of Bioengineering Chongqing University, Chongqing, China;
2. Institute of Systems and Physical Biology, Shenzhen Bay Laboratory, Shenzhen, China;
3. GIOME, Department of Surgery, the Chinese University of Hong Kong, Hong Kong, China.
4. Cyrus Tang Hematology Center, Collaborative Innovation Center of Hematology, Soochow University, Suzhou, China.

\*Corresponding author. Email: [wanggx@cqu.edu.cn](mailto:wanggx@cqu.edu.cn) (Gui-xue Wang); [jhqu@cqu.edu.cn](mailto:jhqu@cqu.edu.cn) (Ju-hui Qiu)

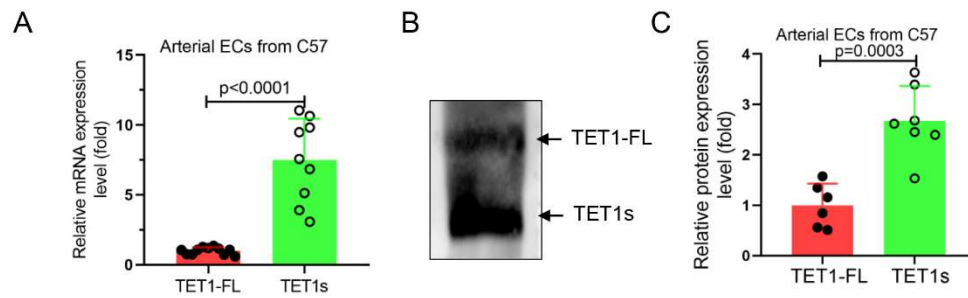

**Figure S1. TET1s is the predominant transcript compared to TET1-FL in arterial ECs from C57 mice.** (A-C) All ECs separated from the aorta of C57 mice. (A) RT-qPCR was used to test the mRNA levels of TET1s and TET1-FL (n>6 per group). (B-C) The TET1s and TET1-FL protein expression level was quantified by WB (n>6 per group). All data were presented as the mean  $\pm$  SD.

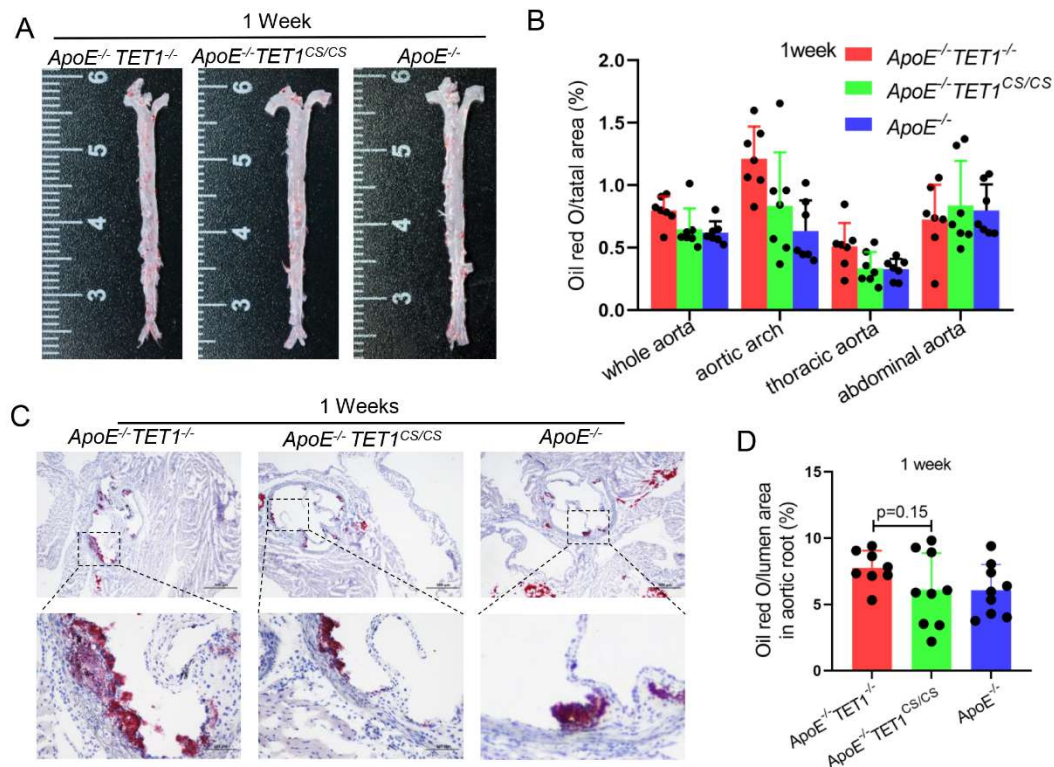

**Figure S2. The plaques in ApoE<sup>-/-</sup>TET1cs/cs mice was no difference compared with ApoE<sup>-/-</sup>TET1<sup>-/-</sup> mice fed a high-fat diet for 1 week.** (A-D) ApoE<sup>-/-</sup> TET1<sup>-/-</sup>, ApoE<sup>-/-</sup> TET1<sup>cs/cs</sup> and ApoE<sup>-/-</sup> mice (8 weeks old) were fed a high-fat diet for 1 weeks. (A) The aortic plaques of ApoE<sup>-/-</sup> TET1<sup>-/-</sup>, ApoE<sup>-/-</sup> TET1<sup>cs/cs</sup> and ApoE<sup>-/-</sup> mice were tested by red oil staining and en face microscopy. (B) The lesion areas in the whole aorta, aortic arch, thoracic aorta, and abdominal aorta sections were

analyzed ( $n > 7$  per group). (C-D) Representative photomicrographs of aortic root slice red oil staining and quantitative analysis of atherosclerotic plaque areas in the aortic root ( $n > 7$  per group). All data were presented as the mean  $\pm$  SD.

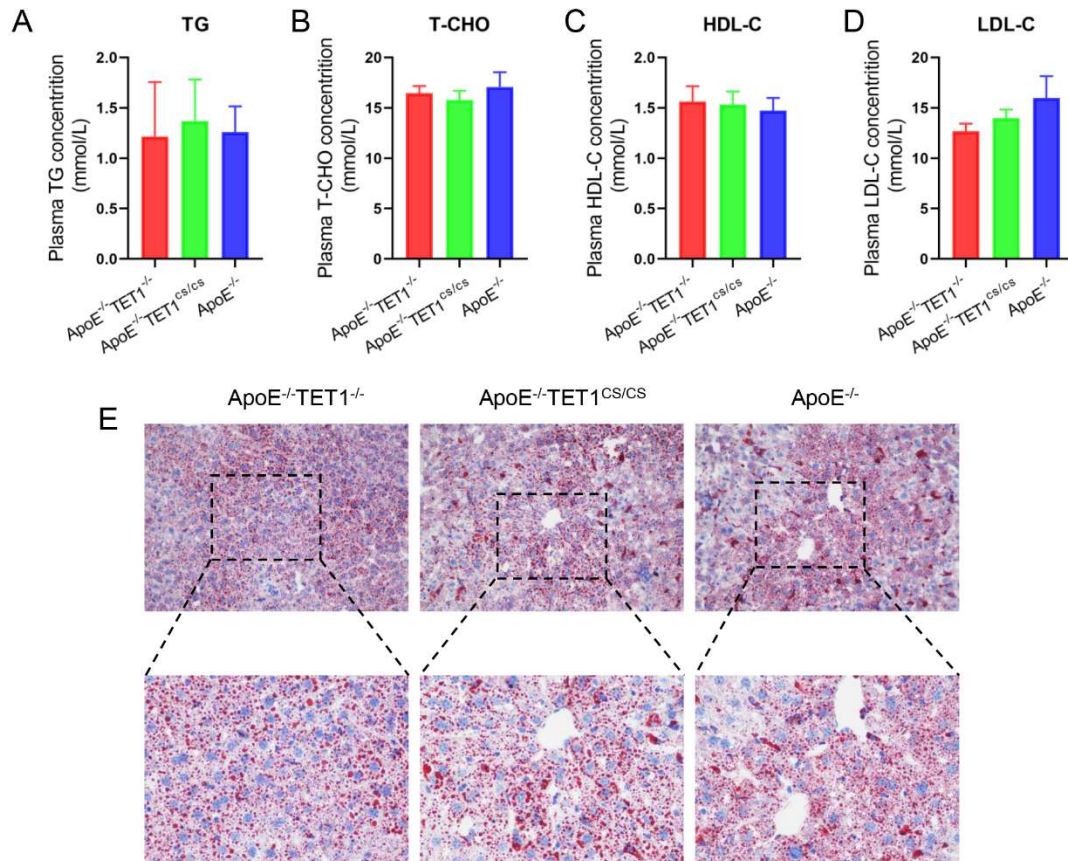

**Figure S3. Deletion of TET1s has no significant change in lipid metabolism in  $ApoE^{-/-}$  mice.** (A-E)  $ApoE^{-/-}TET1^{-/-}$ ,  $ApoE^{-/-}TET1^{CS/CS}$  and  $ApoE^{-/-}$  mice fed with high-fat diet for 12 weeks. (A) Quantitative analyze in triglyceride (TG) of  $ApoE^{-/-}TET1^{-/-}$ ,  $ApoE^{-/-}TET1^{CS/CS}$  and  $ApoE^{-/-}$  mice fed with high-fat diet for 12 weeks. (A-D) Quantitative analyze triglyceride (TG), total cholesterol (T-CHO), LDL-C and HDL-C of  $ApoE^{-/-}TET1^{-/-}$ ,  $ApoE^{-/-}TET1^{CS/CS}$  and  $ApoE^{-/-}$  mice (E) The representative images with hepatic slice staining with oil red O of  $ApoE^{-/-}TET1^{-/-}$ ,  $ApoE^{-/-}TET1^{CS/CS}$  and  $ApoE^{-/-}$  mice. All data are presented with mean value and standard deviation (SD).

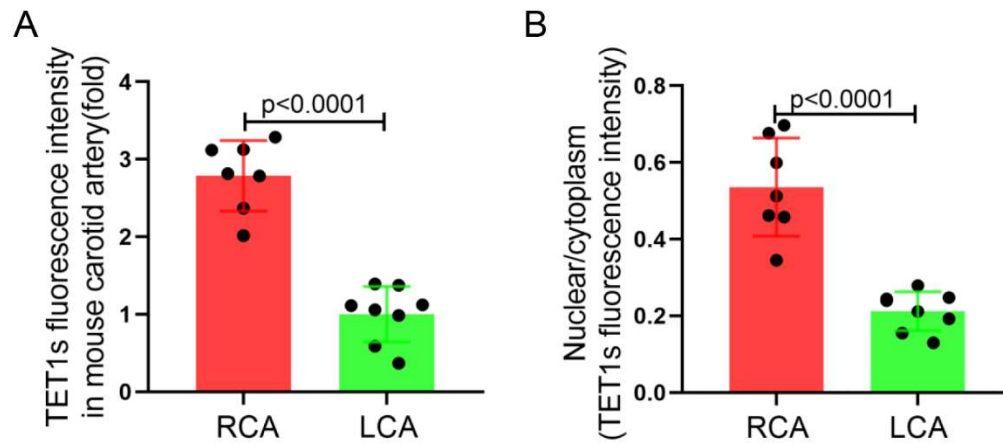

**Figure S4. OSS stimulation was decreased the expression and the nuclear/cytoplasmic ratio of TET1s in carotid ECs in TET1<sup>cs/cs</sup> mice.** (A-B) TET1<sup>cs/cs</sup> mice LCA were ligated for 2 weeks. (A) Quantitative analysis of TET1s fluorescence intensity in LCA and RCA ECs to fig.3B. (B) Quantitative analysis of the nuclear/cytoplasmic ratio of TET1s in LCA and RCA ECs to fig.2B. All data were presented as the mean ± SD.

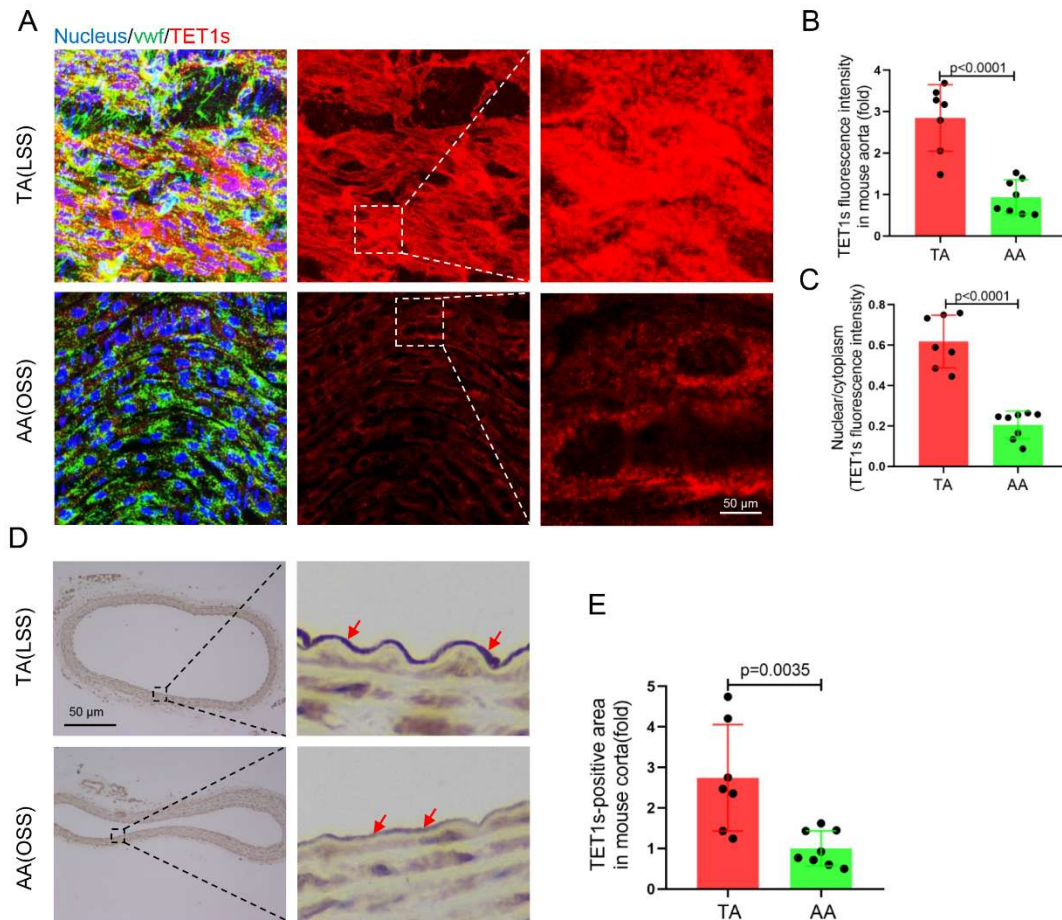

**Figure S5. OSS stimulation was decreased the expression and the nuclear/cytoplasmic ratio of TET1s in aortic ECs in TET1<sup>cs/cs</sup> mice.** (A) Immunofluorescence staining & *en face* for TET1s in AA and TA ECs (n>7 per group). (B-C) Quantitative analysis of the fluorescence intensity and the nuclear/cytoplasmic ratio of TET1s in AA and TA ECs (n>7 per group). (D-E) Immunohistochemical staining for TET1s in AA and TA slices and quantitative analysis of the TET1s-positive area; red arrows indicate the positive area in ECs (n>7 per group). All data were presented as the mean  $\pm$  SD.

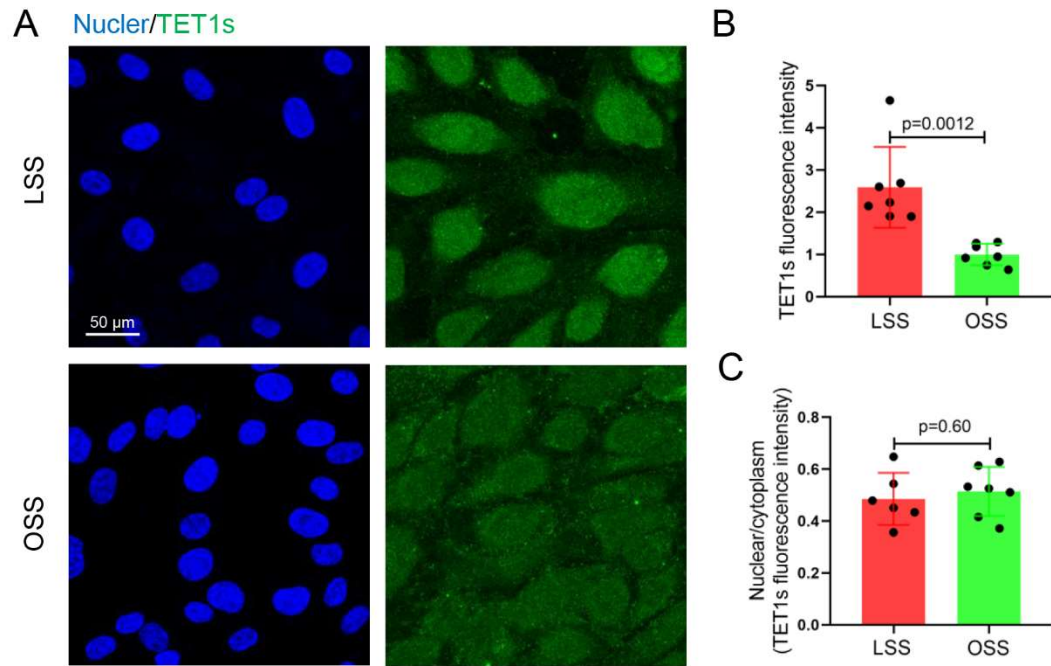

**Figure S6. OSS inhibits TET1s expression levels in primary HUVECs.** (A-C) primary HUVECs with a parallel-plate flow chamber (PPFC) for 24 h. (A) Immunofluorescence staining for TET1s in p-HUVECs. (B-C) Quantitative analysis of the fluorescence intensity and the nuclear/cytoplasmic ratio of TET1s in p-HUVECs (n=7 per group). All data were presented as the mean  $\pm$  SD.

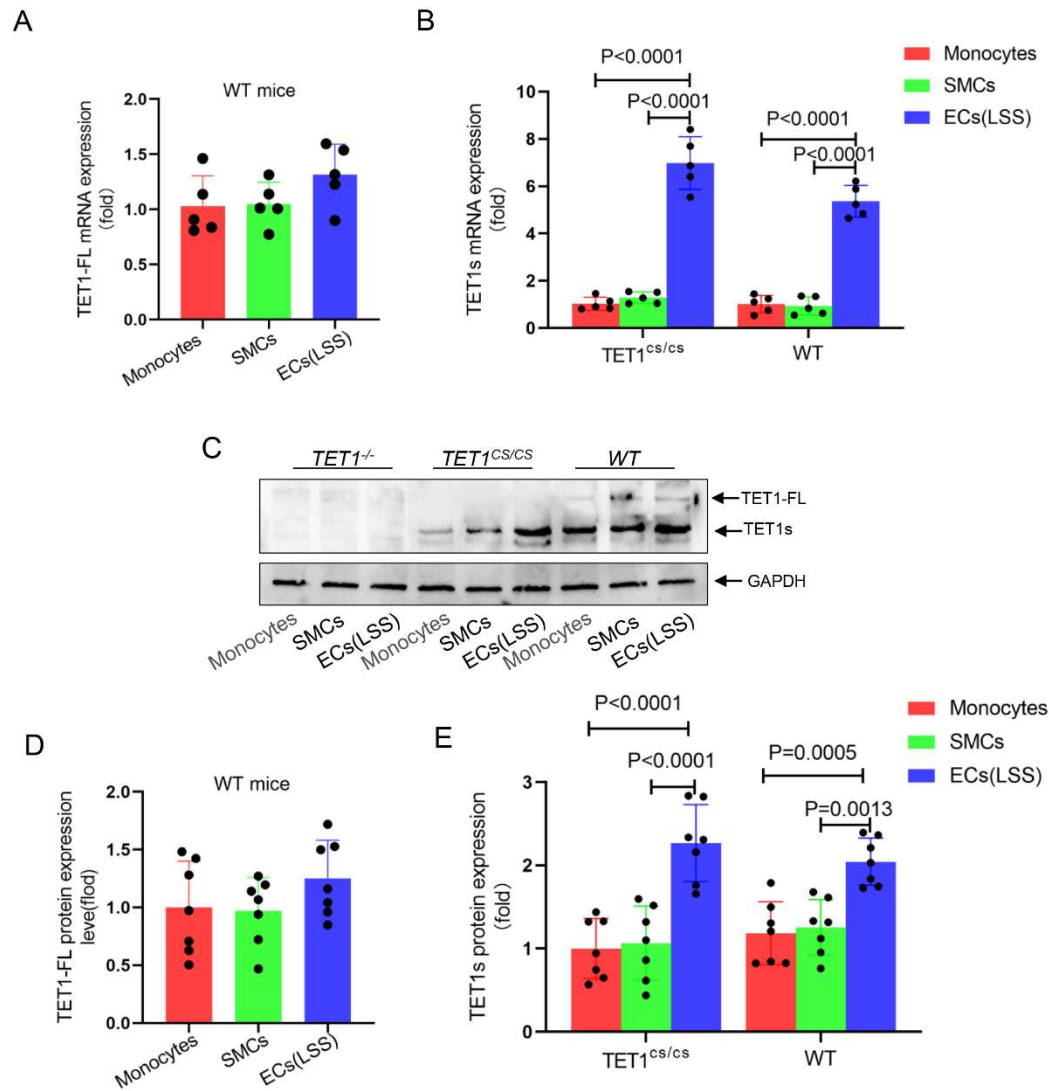

**Figure S7. Low expression levels of TET1s in vascular smooth muscle cells and macrophages.**

(A-C) All ECs separated from the thoracic aorta (TA) of TET1<sup>-/-</sup>, TET1<sup>cs/cs</sup> and WT mice. (A-B) RT-qPCR was used to test the mRNA levels of TET1s and TET1-FL (n=4 per group). (C) The TET1s and TET1-FL protein expression level was quantified by WB (n=4 per group). All data were presented as the mean  $\pm$  SD.

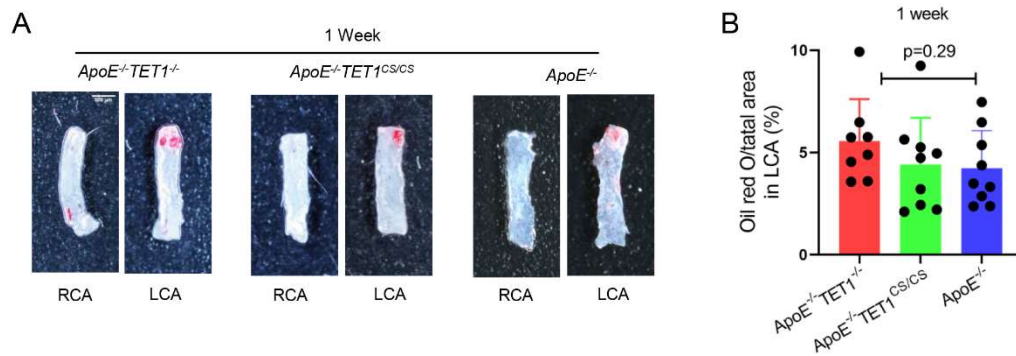

**Figure S8. The carotid plaques in *ApoE<sup>-/-</sup>TET1<sup>cs/cs</sup>* mice with a partial carotid artery ligation is no difference compared with *ApoE<sup>-/-</sup>TET1<sup>-/-</sup>* mice fed a high-fat diet for 1 week. (A-B) *ApoE<sup>-/-</sup>TET1<sup>cs/cs</sup>*, *ApoE<sup>-/-</sup>TET1<sup>-/-</sup>* and *ApoE<sup>-/-</sup>* mice LCAs were ligated and fed a high-fat diet for 1 week; the lesion areas in the carotid artery were tested by red oil stain & en face and were analyzed (n=8 per group). All data were presented as the mean ± SD.**

A

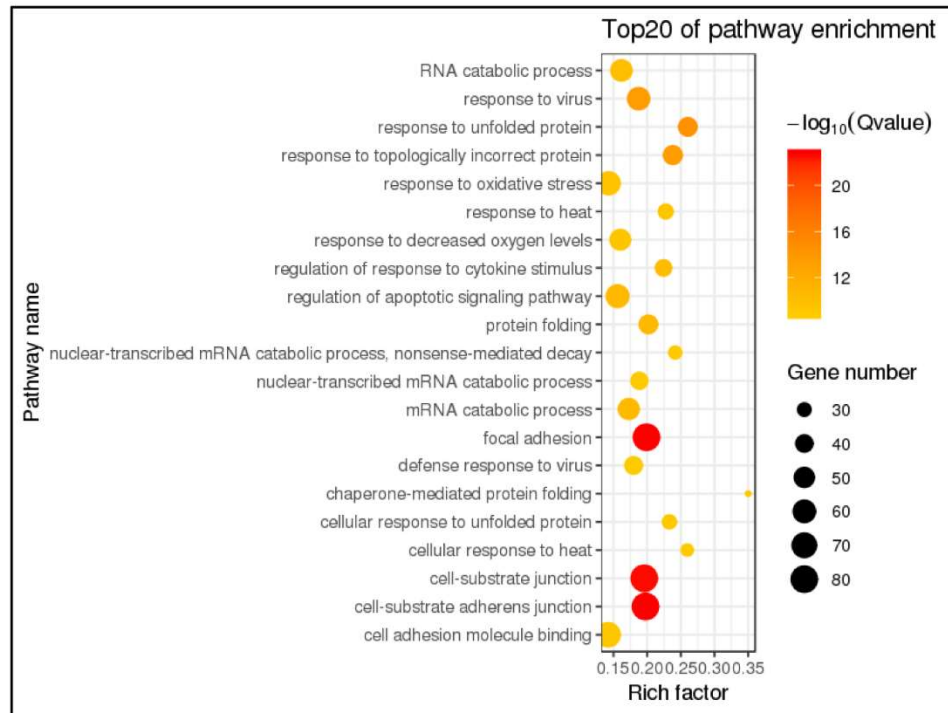

B

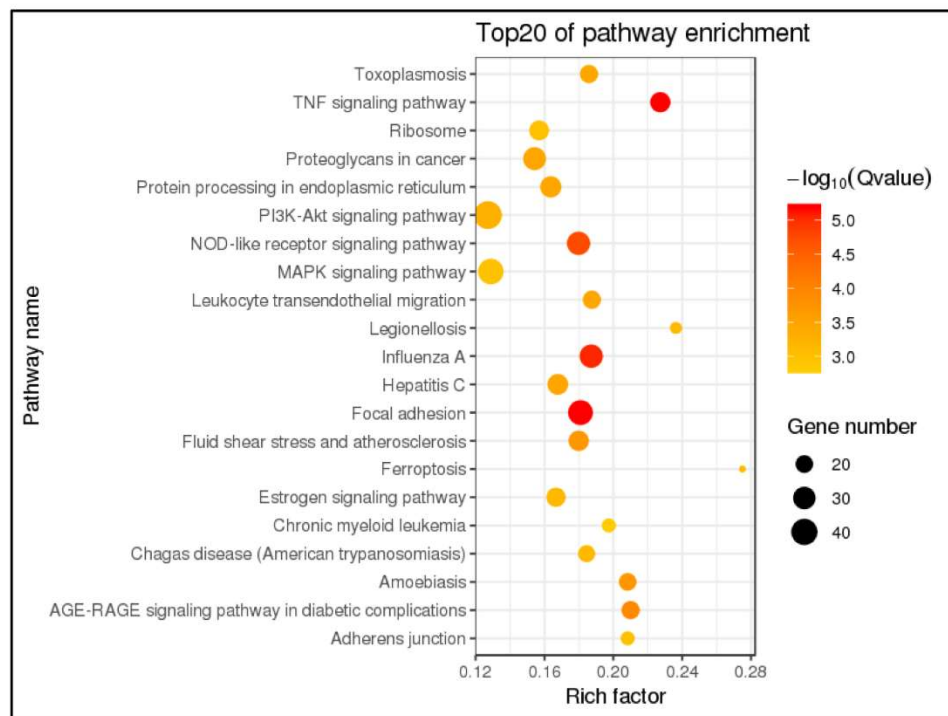

**Figure S9. Differential gene expression enrichment analysis shows that TET1s may regulate endothelial barrier function.** (A-B) RNA sequencing test the global RNA levels of TET1s-overexpressing p-HUVECs and negative control p-HUVECs; the top 20 pathways of differential gene expression GO enrichment analysis (A) and KEGG enrichment analysis (B) with RNA-

sequence data.

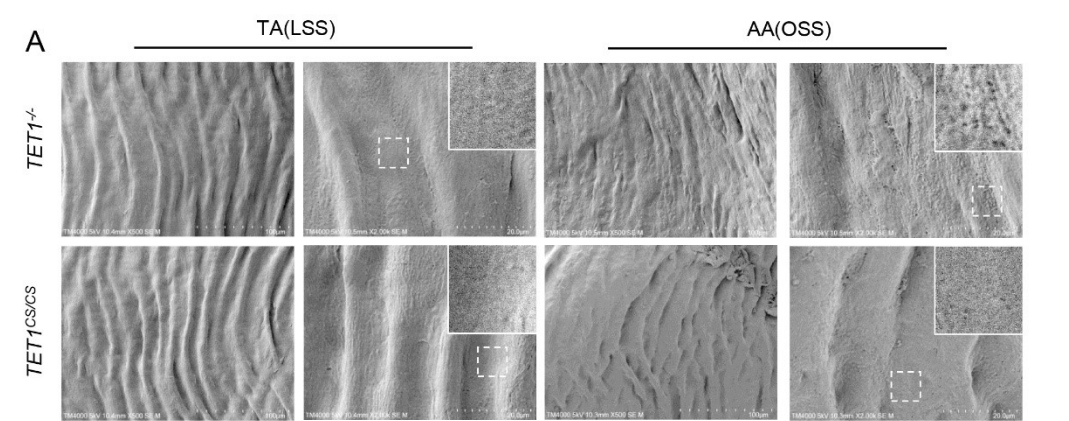

**Figure S10.** The intima of the aortic arch of TET1<sup>cs/cs</sup> mice shows fewer holes compared with TET1<sup>-/-</sup> mice. (A) The morphology of ECs in AA and TA ECs by scanning electron microscopy (SEM).

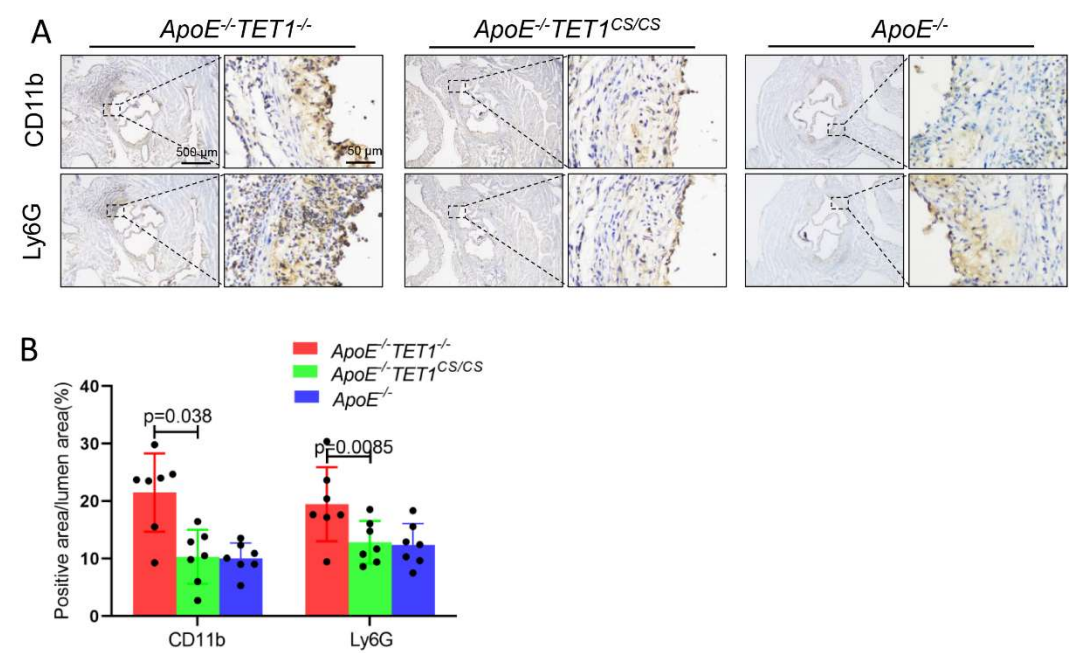

**Figure S11.** Neutrophils were significantly decreased in the plaques of ApoE<sup>-/-</sup>TET1<sup>cs/cs</sup> mice compared with ApoE<sup>-/-</sup>TET1<sup>-/-</sup> mice. (A-B) ApoE<sup>-/-</sup>TET1<sup>cs/cs</sup>, ApoE<sup>-/-</sup>TET1<sup>-/-</sup> and ApoE<sup>-/-</sup> mice were fed a high-fat diet for 4 weeks. The aortic roots were harvested and subjected to further experiments. Representative immunohistochemical staining for Neutrophil-specific antigens CD11b and Ly6G in aortic roots and were analyzed (n=6 per group). All data are presented as the

mean  $\pm$  SD.

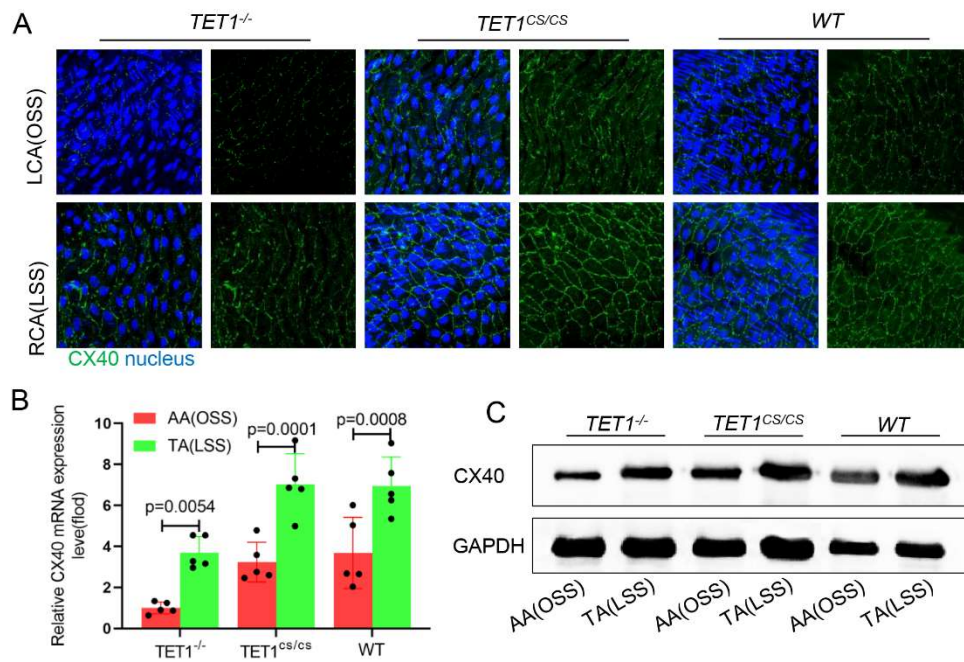

**Figure S12. The endothelial CX40 expression level in *TET1*<sup>-/-</sup> and *TET1*<sup>cs/cs</sup> mice.** (A) *TET1*<sup>-/-</sup>, *TET1*<sup>cs/cs</sup> and WT mice LCAs were ligated for 1 week. Immunofluorescence staining for CX40 in RCA and LCA (n=3 per group). (B-C) All ECs separated from the aortic arch (AA) and thoracic aorta (TA) of *TET1*<sup>-/-</sup>, *TET1*<sup>cs/cs</sup> and WT mice. (B) RT-qPCR was used to test the mRNA levels of CX40 (n=5 per group). (C-D) The CX40 protein expression level was quantified by WB (n=4 per group). All data were presented as the mean  $\pm$  SD.

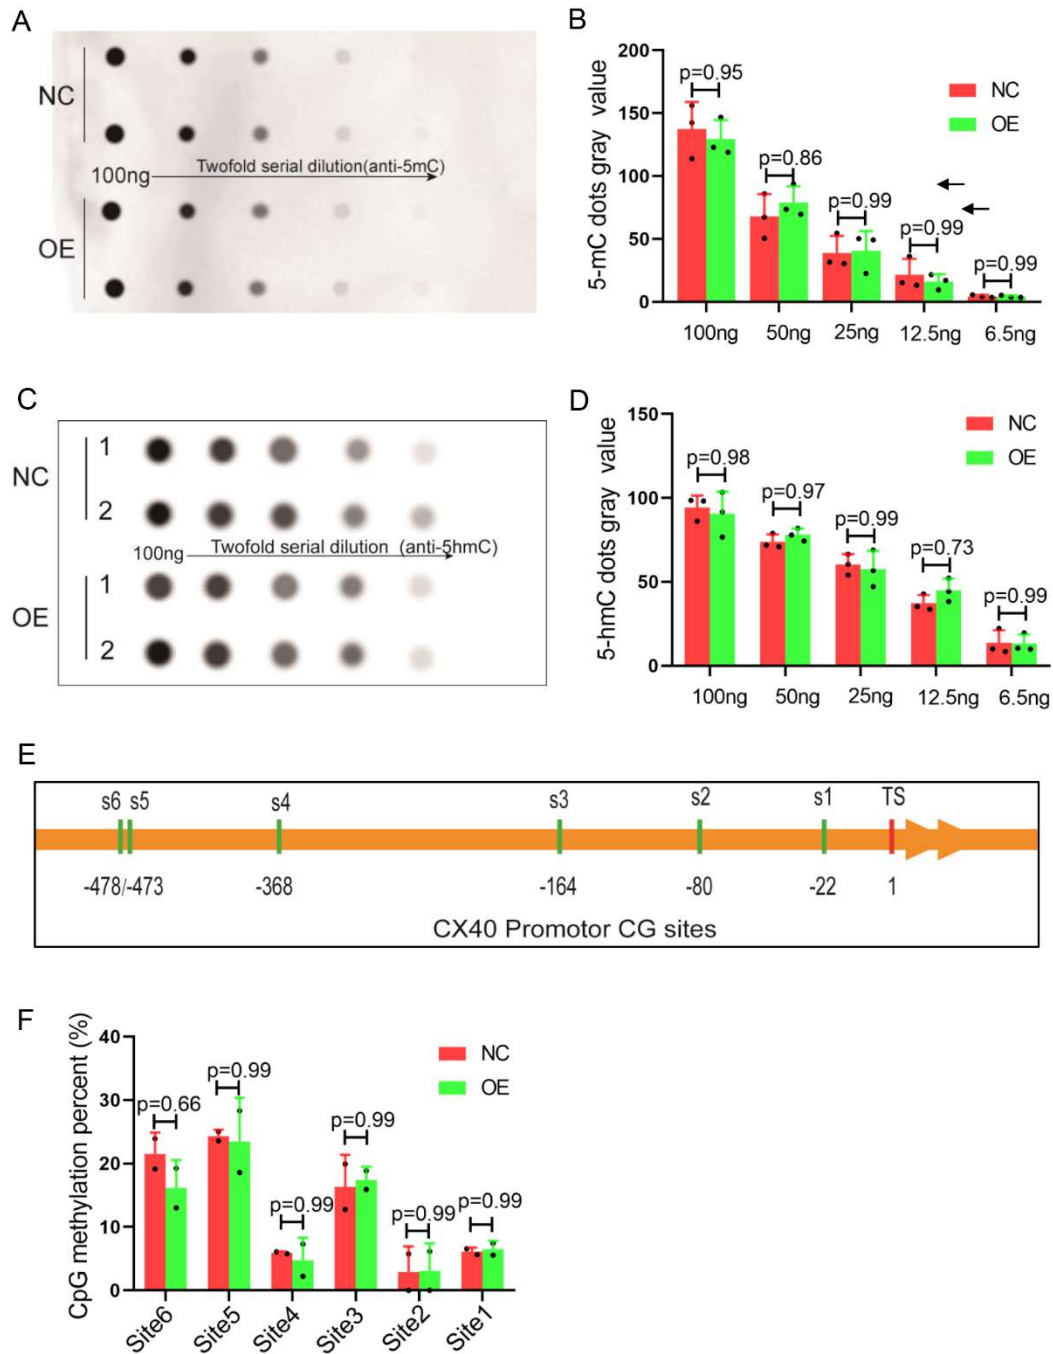

**Figure S13. TET1s overexpression did not cause a global difference in 5mC levels in p-HUVECs.** (A-F) p-HUVECs were transfected with TET1s-overexpressing adenovirus and negative control adenovirus and further tested after 48 h. (A-B) Dot blot assay was used to analyze the global 5mC levels of p-HUVECs (n=6 per group). (C-D) Dot blot assay was used to analyze the global 5hmC levels of p-HUVECs (n=6 per group). (E-F) Pyrosequencing assay analyzed the local 5hmC levels in the CX40 promoter 6 CG sites (S1-S6 indicates site 1-site 6; TS indicates transcriptional start; n=3 per group). All data were presented as the mean  $\pm$  SD.

**Table S1. The primers for gene-test of knockout mice.**

| primers (name) | sequence(5'-3')        |
|----------------|------------------------|
| GT-apoE-OF     | GCCTAGCCGAGGGAGAGCCG   |
| GT-apoE-IR     | TGTGACTTGGGAGCTCTGCAGC |
| GT-apoE-OR     | GCCGCCCCGACTGCATCT     |
| GT-TET1-F      | AACTGATTCCCTTCGTGCAG   |
| GT-TET1-R      | TTAAAGCATGGGTGGGAGTC   |
| GT-TET1CS-OF   | ATCTGGGCAATGTTGTGACTC  |
| GT-TET1CS-IR   | CATTGTAAACCCGTTGCAAGT  |
| GT-TET1CS-OR   | TTCTTTCCCTTCCACTATGCA  |

**Table S2. The primers for RT-qPCR.**

| primers (name) | sequence(5'-3')         |
|----------------|-------------------------|
| H-GAPDH-F      | GGAGCGAGATCCCTCCAAAAT   |
| H-GAPDH-R      | GGCTGTTGTCATACTTCTCATGG |
| H-TET1FL-F     | GCGCGAGTTGGAAAGTTTG     |
| H-TET1FL-R     | GCTCAGTCACACAAGGTTTGG   |
| H-TET1s-F      | CAAGCAAGATGGCTACCTCGT   |
| H-TET1s-R      | GGGGCCTCTTGTTTTCCTTTA   |
| H-CX40-F       | GCTGCCAGAATGTCTGCTAC    |
| H-CX40-R       | GGTACTCGTAAGAGCCAGAGC   |
| H-TMEM129-F    | GAGGTGACCTTCACTCTCGC    |
| H-TMEM129-R    | GCCCACATAGTAGCCGAGC     |
| H-TGFA-F       | AGGTCCGAAAACACTGTGAGT   |
| H-TGFA-R       | AGCAAGCGGTTCTTCCCTTC    |
| H-IGF1-F       | GCTCTTCAGTTCGTGTGTGGA   |

|            |                            |
|------------|----------------------------|
| H-IGF1-R   | GCCTCCTTAGATCACAGCTCC      |
| H-APLNR-F  | CCTGCATCAGCTACGTCAACA      |
| H-APLNR-R  | GGGATGGATTTCTCGTGCATCT     |
| H-PIEZO2-F | ATGGCCTCAGAAGTGGTGTG       |
| H-PIEZO2-F | ATGTCCTTGCATCGTCGTTTT      |
| H-KLF2-F   | CTACACCAAGAGTTCGCATCTG     |
| H-KLF2-R   | CCGTGTGCTTTCGGTAGTG        |
| H-KLF4-F   | CAGCTTCACCTATCCGATCCG      |
| H-KLF4-R   | GACTCCCTGCCATAGAGGAGG      |
| M-TET1FL-R | TACTGCAAGAATCGAAAGAACAGCCA |
| M-TET1FL-R | CGGAAGGTGTGTGTCAGTGGGT     |
| M-TET1s-F  | TAAGACAGACTTTTAGGGGGAAAG   |
| M-TET1s-R  | GTGTGTGTCAGTGGGTAAACAGT    |
| M-GAPDH-F  | TGACCTCAACTACATGGTCTACA    |
| M-GAPDH-R  | CTCCCATCTCGGCCTTG          |
| M-CX40-F   | GGTCCACAAGCACTCCACAG       |
| M-CX40-R   | CTGAATGGTATCGCACCGGAA      |

**Table S3. The primers for CHIP- qPCR.**

| primers (name) | sequence(5'-3')            |
|----------------|----------------------------|
| P1-F           | TCCTGTCACTGAGGAAATTCCTGTTC |
| P1-R           | TGCTGTCTGAGATGGCTCTTAATGAG |
| P2-F           | TCATTAAGAGCCATCTCAGACAGCAG |
| P2-R           | AATCTCTGATGCTGGCCTTGC      |
| P3-F           | AAGGCAAGGCCAGCATCAG        |
| P3-R           | TCCTGTGCATGACTTTCTGGAATG   |
| P4-F           | CTCATTCAGAAAGTCATGCACAGG   |
| P4-R           | GCCTGAAGTCAAGCTTGTCTGG     |
| P5-F           | CCAGACAAGCTTGACTTCAGGC     |

|      |                             |
|------|-----------------------------|
| P5-R | GAGATCTTGTCTGAGAGCATTATGCTC |
|------|-----------------------------|

**Table S4. The primers for pyrosequencing assays.**

| primers (name)   | sequence(5'-3')                |
|------------------|--------------------------------|
| 1.GJA5-1F(230bp) | TTTGGGTGAAAGTTTATTGGATATG      |
| 1.GJA5-1R        | TCCCAACTTTAATCTACTCCTATCACT    |
| 1.GJA5-1S        | CTCAAAAACATTAACTTCC            |
| 2.GJA5-2F(72bp)  | TGGTTTTTGGGTGAAAGTTT           |
| 2.GJA5-2R        | AAACCATCTCAAACAACAAATATCTATTAA |
| 2.GJA5-2S        | TTTTGGGTGAAAGTTTATT            |
| 3.GJA5-3F(224bp) | AGAGGATTAGAAAAGGTAAGGTTAGTAT   |
| 3.GJA5-3R        | CCTCTTTAAAACCTAAAATCAAACCTATCT |
| 3.GJA5-3S        | AGAGGTTTTTAAGTAAATAGTG         |
| 4.GJA5-2F(221bp) | AAGGAGATTTTGTTTTGAGAGTATTATG   |
| 4.GJA5-4R        | AACAATACTACCCATCCTTTCAACTACCC  |
| 4.GJA5-4S        | ATTAAAAAGGAAGTTAGATTGT         |
| 5.GJA5-5F(140bp) | TGATTTTAGGTTTAAAGAGGAAGTTAATG  |
| 5.GJA5-5R        | ACTCAACCCTTCCCTAAC             |
| 5.GJA5-5S        | ACCCTTCCCTAACTC                |
